# Supplementary material
Source: PubMed Central journal article supplement (PMC2492472)
Supplement: 0804549105_0804549105SI.pdf [file 0804549105_0804549105SI.pdf]

# Supporting Information

Mitchell et al. 10.1073/pnas.0804549105

## SI Text

**Clinical Samples.** All clinical samples described here were obtained from subjects who had given informed consent, and studies were performed under the aegis of Institutional Review Board (IRB)-approved protocols.

**Human donor blood samples used to generate data in Figs. 1 and 2, Fig. S1, and Fig. S3.** Blood was collected from healthy donors in EDTA tubes (BD Biosciences 366643). All individuals were in good health based on self-report. Blood was processed for plasma isolation within 2 h of collection using the protocol described. Self-reported information on gender and prior history of cancer is given in Table S6.

**Matched serum and plasma samples from healthy individuals used for analysis reported in Fig. 2C.** Blood was collected from healthy women at increased risk of developing ovarian cancer (based on family history) who were participating in a Fred Hutchinson Cancer Research Center screening study for ovarian cancer early detection. Individuals did not have cancer at the time of sample collection or up to 2 years later. Plasma and serum samples were collected from each individual at the same draw. Ages of the women ranged from 45 to 55 years and all samples were collected in 2005. Blood was collected from consented study participants by a trained phlebotomist and processed within 4 hours of collection.

**Serum samples from patients with prostate cancer and matched healthy controls reported in Fig. 4.** Cancer samples were from patients with advanced (metastatic) prostate cancer and were obtained from patients being cared for at the University of Washington. Healthy controls were obtained from individuals undergoing prostate cancer screening including a digital rectal examination (DRE) and serum levels of PSA. Those subjects without suspicion of abnormalities (DRE) and within the normal range for serum PSA levels were consented as part of the normal healthy control subset. As far as possible, samples chosen were matched between cancer and control groups with respect to age of participants and duration of storage. All subjects were advised of the intent of the research study and those who agreed to participate signed a University of Washington Human Subject's Committee approved Informed Consent Form for a peripheral blood draw. Additional data pertaining to the serum samples obtained from prostate cancer patients and cancer-free controls are provided in Table S3.

**Cell Culture.** 22Rv1 human prostate cancer-derived cells were cultured in standard plastic tissue culture plates in RPMI medium 1640 (GIBCO) supplemented with 10% FBS and 1% penicillin-streptomycin at 37°C in a 5% CO<sub>2</sub> incubator. Primary prostate epithelial and primary prostate stromal cells were cultured as described (1).

**Plasma Small RNA Library Construction and Sequencing. RNA isolation.** Total RNA was prepared from human plasma from individual 006 (see Table S6) using a scaled-up version of the *mirVana* PARIS (Ambion) protocol: 10 ml of plasma was thawed on ice, two 5-ml aliquots were transferred to 50-ml tubes, diluted with an equal volume of *mirVana* PARIS 2X Denaturing Solution, mixed thoroughly by vortexing for 30 s and incubated on ice for 5 min. An equal volume (10 ml) of acid/phenol/chloroform (Ambion) was then added to each aliquot. The resulting solutions were vortexed for 1 min and spun for 5 min at 8,000 rpm, 20°C in a JA17 rotor. The acid/phenol/chloroform extraction was repeated three times. The resulting aqueous volume was mixed

thoroughly with 1.25 volumes of 100% molecular-grade ethanol and passed through a *mirVana* PARIS column in sequential 700- $\mu$ l aliquots. The column was washed following the manufacturer's protocol, and RNA was eluted in 105  $\mu$ l of elution buffer (95°C). A total of 1.5  $\mu$ l of the eluate was quantified by Nanodrop. Approximately 250 ng of total plasma RNA was spiked with  $\sim$ 10 fmol (10,000 cpm) <sup>32</sup>P-labeled 18- and 24-nt RNA markers (Dharmacon) (2) and gel purified by electrophoresis through a 13-cm 15% denaturing polyacrylamide gel (National Diagnostics) at 300 V for 2 h 15 m (1 $\times$ TBE). The 18- to 24-nt fraction was identified by phosphorimaging and excised with a scalpel. The subsequent gel slice was manually diced into smaller pieces and eluted in a 1.5-ml Eppendorf tube with shaking overnight at room temperature in 500  $\mu$ l of 0.4 M NaCl. The eluate was filtered through a Pall Nanosep 0.2- $\mu$ m spin filter for 5 min at 14,000  $\times$  g, room temperature. Twenty micrograms of glycogen and 1 ml of 100% molecular-grade ethanol were added to the filtrate and mixed by inversion, and RNA was precipitated overnight at  $-80^{\circ}$ C. The precipitate was spun at maximum speed for 15 min, 4°C. The supernatant was removed by pipetting and the tube was spun again for 1 min. The remaining supernatant was removed, the precipitate was air-dried 2–3 min or until the pellet turned from white to clear and resuspended in 11  $\mu$ l of RNase-free water.

**3' and 5' ligations.** Resuspended miRNA fractions were incubated in a 20  $\mu$ l of reaction containing 5  $\mu$ l of 50% PEG8000 (to 12.5%), 1  $\mu$ l of 100  $\mu$ M miRNA cloning linker 1 (IDT), and 1  $\mu$ l (200 units) of NEB T4 Rnl2 (plus enzyme buffer) for 2 h at room temperature. Reactions were stopped with 20  $\mu$ l of Gel Loading Buffer II (Ambion) and denatured for 5 min at 80°C before gel purification as above except through a 12% PAGE gel. The 35- to 41-nt 3'-ligated fraction was identified by phosphorimaging, excised, eluted, filtered, precipitated as above, and resuspended in 13  $\mu$ l of water. 3'-ligated substrates were incubated in a 20- $\mu$ l reaction with 2  $\mu$ l of DMSO, 1  $\mu$ l of 100  $\mu$ M Illumina small-RNA cloning 5' linker (rGrUrUrCrArGrArGrUrUrCrUrArCrArGrUrCrCrGrArCrGrArUrC) and 2  $\mu$ l of (20 units) Ambion T4 RNA ligase (plus enzyme buffer) for 1 h at 37°C. 5'-ligated substrates were denatured and gel purified as above except through a 10% PAGE gel. The 58- to 65-nt 5'-, 3'-ligated miRNA fraction was excised, eluted, filtered, precipitated as above, and resuspended in 20  $\mu$ l of RNase-free water.

**RT-PCR.** Half (10  $\mu$ l) of the 5'-, 3'-ligated miRNA solution was reverse-transcribed in a 20- $\mu$ l reaction containing 1 M dNTPs, 10  $\mu$ M DTT, 2  $\mu$ l of 10  $\mu$ M RT primer (CAAGCAGAAGACG-GCATACGATTGATGGTGCCTACAG) and 1  $\mu$ l of SuperScript RT III (Invitrogen) for 1 h at 50°C. Five microliters of cDNA was amplified in a 100- $\mu$ l PCR using 1  $\mu$ l each of 100  $\mu$ M RT primer and forward primer (AATGATACGGCGACCAC-CGACAGGTTTCAGAGTTCTACAGTCCGA) and Platinum Taq Polymerase High Fidelity (Invitrogen) for 15 cycles. PCR products of 105–110 bp were gel-purified through 4% metaphor agarose for 3.5 h at 120V and excised using a clean scalpel. PCR products were recovered by dissolving the agarose in 50  $\mu$ l (total volume) of 0.4 M NaCl for 10 min at 70°C. Five hundred microliters of equilibrated phenol (pH 8.0) was added, followed by vortexing for  $\sim$ 30 s and spinning for 5 min at maximum speed. The resulting aqueous phase was extracted twice with phenol/chloroform/isoamyl alcohol, extracted with chloroform once, and precipitated with 20  $\mu$ g glycogen and 1 ml of 100% ethanol at  $-80^{\circ}$ C overnight. Precipitates were spun at maximum speed for 15 min at 4°C. The supernatant was removed by pipetting and



samples. Processing time from first cardiac puncture through last tumor harvest was 1 h, 45 min for the first cohort, 45 min for the second. Weights of the frozen tumors from the first cohort after harvest are provided in [Table S7](#).

**Blood Processing and Isolation of Serum and Plasma. Isolation of mouse plasma.** Blood was processed within 1 h of collection by centrifugation at  $1,300 \times g$  at  $4^{\circ}\text{C}$  in a refrigerated microfuge for 10 min. Plasma was transferred to a fresh RNase/DNase-free 1.5-ml microfuge tube, leaving enough plasma in the original tube such that the lowest point of the meniscus did not touch the pellet. Plasma samples were stored at  $-80^{\circ}\text{C}$ .

**Isolation of human plasma for experiments shown in Figs. 1 and 2, and Fig. S1 and Fig. S3.** Blood was collected from healthy donors in EDTA tubes (BD Biosciences 366643) and processed for isolation of plasma within 2 h of collection. At a given sitting, the amount of blood drawn ranged from  $\sim 20$  to  $\sim 90$  ml. Blood from several EDTA tubes was pooled and transferred to RNase/DNase-free 50-ml conical tubes (Greiner), and centrifuged at  $1,200 \times g$  at room temperature in a Hettich Rotanta 460R benchtop centrifuge for 10 min. Plasma was transferred to a fresh tube, leaving behind a fixed height of 0.5 cm plasma supernatant above the pellet to avoid disturbing the pellet. Plasma was aliquoted, with inversion to mix between each aliquot, and stored at  $-80^{\circ}\text{C}$ . The exception for this was plasma miRNA stability studies reported in [Fig. 2A](#), where freshly collected plasma was carried into the studies immediately rather than being frozen for storage initially.

**Isolation of serum and plasma from matched samples used for analysis reported in Fig. 2C.** Blood was collected from consented study participants by a trained phlebotomist. Up to 50 ml of whole blood was collected at the same draw for both serum (serum separator tube; SST) and plasma isolation (EDTA tube). For serum isolation, samples were allowed to sit at room temperature for at least 30 min between collection and centrifugation to allow the blood in the SST tubes to clot. Serum from the SST tubes was aliquoted into microcentrifuge tubes, 1 ml per aliquot. EDTA tubes were spun in a benchtop centrifuge at  $1,200 \times g$  for 10 min to separate the cells from the fluid. Plasma was aliquoted into microcentrifuge tubes, 1 ml per aliquot. Blood samples were processed and serum and plasma were frozen within 4 h of the blood draw. After aliquoting, plasma and serum were frozen on dry ice and subsequently stored at  $-80^{\circ}\text{C}$ .

**Serum samples from patients with prostate cancer and matched healthy controls.** All peripheral blood samples were collected in a 10-ml Vacutainer SST Plus Blood Collection Tube (BD367985). Samples were allowed to sit at room temperature for a minimum of 30 min and a max of 2 h. Separation of the clot was accomplished by centrifugation at  $1,000$ – $1,300 \times g$  at  $4^{\circ}\text{C}$  for 15–20 min. The serum was removed and dispensed in aliquots of  $500 \mu\text{l}$  into  $500$ – $750\text{-}\mu\text{l}$  cryo-tubes. Specimens were stored at  $-80^{\circ}\text{C}$ . Aliquots used for analysis of pools underwent two freeze-thaw cycles and those used for analysis of individual samples underwent three freeze-thaw cycles since the time of collection.

**RNA Isolation Procedures. RNA isolation from cultured cells.** Cells were washed twice with PBS. Six hundred microliters of Lysis/Binding buffer from the *mirVana* miRNA isolation kit (Ambion 1560) was added directly to the culture plate or flask to lyse the cells. Lysates were harvested manually with a sterile cell scraper and transferred to a 2-ml tube. Samples were stored at  $-80^{\circ}\text{C}$  or RNA was immediately extracted using the manufacturer's recommended protocol for total RNA isolation.

**RNA isolation from mouse plasma samples.** One hundred microliters of mouse plasma was thawed on ice and transferred to a tube containing  $100 \mu\text{l}$  of  $\text{H}_2\text{O}$  and  $200 \mu\text{l}$  of 2X Denaturing Solution (Ambion). To allow for normalization of sample-to-sample variation in the RNA isolation step, synthetic *C. elegans* miRNAs *cel-miR-39*, *cel-miR-54*, and *cel-miR-238* (synthetic RNA oligo-

nucleotides synthesized by Qiagen) were added (as a mixture of 25 fmol of each oligonucleotide in a  $5\text{-}\mu\text{l}$  total volume) to each denatured sample (i.e., after combining the plasma sample with Denaturing Solution). RNA was isolated using the *mirVana* PARIS kit following the manufacturer's protocol for liquid samples (Ambion), modified such that samples were extracted twice with an equal volume of acid-phenol chloroform (as supplied by the Ambion kit). RNA was eluted with  $105 \mu\text{l}$  of water. The average volume of eluate recovered from each column was  $80 \mu\text{l}$ .

**RNA isolation from human plasma and serum samples.** For all experiments,  $400 \mu\text{l}$  of human plasma or serum was thawed on ice and lysed with an equal volume of 2X Denaturing Solution (Ambion). In the case of serum pools used for screening human prostate cancer biomarker candidates ([Table S2](#)), pools were created by combining  $20 \mu\text{l}$  of each of 25 samples. The pools were mixed by inversion and  $400 \mu\text{l}$  was transferred to a new tube for RNA isolation. To allow for normalization of sample-to-sample variation in RNA isolation, synthetic *C. elegans* miRNAs *cel-miR-39*, *cel-miR-54*, and *cel-miR-238* (synthetic RNA oligonucleotides synthesized by Qiagen) were added (as a mixture of 25 fmol of each oligonucleotide in a  $5\text{-}\mu\text{l}$  total volume) to each denatured sample (i.e., after combining the plasma sample with Denaturing Solution) with the exception of samples for experiments shown in [Fig. 2B](#) that were intended to test for endogenous plasma RNase activity. RNA was isolated using the *mirVana* PARIS kit following the manufacturer's protocol for liquid samples (Ambion), modified such that samples were extracted twice with an equal volume of acid-phenol chloroform (as supplied by the Ambion kit). RNA was eluted with  $105 \mu\text{l}$  of Ambion elution solution according to the manufacturer's protocol. The average volume of eluate recovered from each column was  $80 \mu\text{l}$ .

**Measurement of miRNA Levels in RNA from Plasma and Serum by Using TaqMan qRT-PCR Assays. Procedure for miRNA assay of RNA isolated from serum or plasma.** A fixed volume of  $1.67 \mu\text{l}$  of RNA solution from the  $\sim 80 \mu\text{l}$ -eluate from RNA isolation of a given sample was used as input into the reverse transcription (RT) reaction. For samples in which RNA was isolated from a  $400\text{-}\mu\text{l}$  plasma or serum sample, for example,  $1.67 \mu\text{l}$  of RNA solution represents the RNA corresponding to  $(1.67/80) \times 400 = 8.3 \mu\text{l}$  plasma or serum. For generation of standard curves of chemically synthesized RNA oligonucleotides corresponding to known miRNAs, varying dilutions of each oligonucleotide were made in water such that the final input into the RT reaction had a volume of  $1.67 \mu\text{l}$ .

Input RNA was reverse transcribed using the TaqMan miRNA Reverse Transcription Kit and miRNA-specific stem-loop primers (Applied BioSystems) in a small-scale RT reaction [comprised of  $1.387 \mu\text{l}$  of  $\text{H}_2\text{O}$ ,  $0.5 \mu\text{l}$  of 10X Reverse-Transcription Buffer,  $0.063 \mu\text{l}$  of RNase-Inhibitor (20 units/ $\mu\text{l}$ ),  $0.05 \mu\text{l}$  of 100 mM dNTPs with dTTP,  $0.33 \mu\text{l}$  of Multiscribe Reverse-Transcriptase, and  $1.67 \mu\text{l}$  of input RNA; components other than the input RNA were prepared as a larger volume master mix], using a Tetrad2 Peltier Thermal Cycler (BioRad) at  $16^{\circ}\text{C}$  for 30 min,  $42^{\circ}\text{C}$  for 30 min and  $85^{\circ}\text{C}$  for 5 min. For *miR-15b*, *miR-16*, *miR-19b*, and *miR-24* and *C. elegans* miRNAs,  $2.25 \mu\text{l}$  of diluted RT product (prepared by combining  $5.0 \mu\text{l}$  of RT product with  $28.9 \mu\text{l}$  of  $\text{H}_2\text{O}$ ) was combined with  $2.75 \mu\text{l}$  of PCR assay reagents (comprised of  $2.5 \mu\text{l}$  of TaqMan 2X Universal PCR Master Mix, No AmpErase UNG and  $0.25 \mu\text{l}$  of TaqMan miRNA Assay) to generate a PCR of  $5.0 \mu\text{l}$  of total volume. Real-time PCR was carried out on an Applied BioSystems 7900HT thermocycler at  $95^{\circ}\text{C}$  for 10 min, followed by 40 cycles of  $95^{\circ}\text{C}$  for 15 s and  $60^{\circ}\text{C}$  for 1 min. Data were analyzed with SDS Relative Quantification Software version 2.2.2 (Applied BioSystems.), with the auto-

matic Ct setting for assigning baseline and threshold for Ct determination.

For *miR-100*, *miR-125b*, *miR-141*, *miR-205*, *miR-296*, *miR-660*, and *miR-629\**, the protocol was modified as follows to include a preamplification step. A 1.25- $\mu$ l aliquot of undiluted RT product was combined with 3.75  $\mu$ l of Preamplification PCR reagents [comprised, per reaction, of 2.5  $\mu$ l of TaqMan PreAmp Master Mix (2X) and 1.25  $\mu$ l of 0.2X TaqMan miRNA Assay (diluted in TE)] to generate a 5.0- $\mu$ l preamplification PCR, which was carried out on a Tetrad2 Peltier Thermal Cycler (BioRad) by heating to 95°C for 10 min, followed by 14 cycles of 95°C for 15 s and 60°C for 4 min. The preamplification PCR product was diluted (by adding 20  $\mu$ l of H<sub>2</sub>O to the 5- $\mu$ l preamplification reaction product), following which 2.25  $\mu$ l of the diluted material was introduced into the real-time PCR and carried forward as described for the other miRNA assays above. Detailed information regarding miRNA Taqman assays used in this study is provided in Table S8.

**Generation of standard curves for absolute quantification of miRNAs.** Synthetic single-stranded RNA oligonucleotides corresponding to the mature miRNA sequence (miRBase Release v.10.1) were purchased from IDT (*miR-629\**), Sigma (*miR-141* and *miR-660*) or Qiagen (*miR-15b*, *miR-16*, *miR-19b*, and *miR-24*). Sequence information is provided in Table S5. Synthetic miRNAs were input into the RT reaction over an empirically-derived range of copies to generate standard curves for each of the miRNA TaqMan assays listed above (representative standard curves for each assay are provided in Fig. S2). In general, the lower limit of accurate quantification for each assay was designated based on the minimal number of copies input into an RT reaction that resulted in a Ct value within the linear range of the standard curve and that was also not equivalent to or higher than a Ct obtained from an RT input of lower copy number. A line was fit to data from each dilution series using Ct values within the linear range, from which  $y = \ln(x) + b$  equations were derived for quantification of absolute miRNA copies ( $x$ ) from each sample Ct ( $y$ ). Absolute copies of miRNA input into the RT reaction were converted to copies of miRNA per microliter plasma (or serum) based on the knowledge that the material input into the RT reaction corresponds to RNA from 2.1% of the total starting volume of plasma [i.e., 1.67  $\mu$ l of the total RNA eluate volume (80  $\mu$ l on average) was input into the RT reaction].

The layout of samples in the RT, preamplification, and real-time PCR reactions in strip tubes and multiwell plates was designed to minimize the chance of cross-contamination by standard curve samples and to minimize systematic bias when comparing groups such as xenografted mice and control mice. Whenever possible, experimental samples were separated from standard curves by at least one empty row. In the mouse xenograft experiments, RNA samples from xenografts and controls were blinded and randomized in layout on the PCR plate. In the human xenograft experiments, case and control samples were alternated in sequence to avoid bias related to geographic location on the PCR plate.

**Normalization of Experimental qRT-PCR Data Using Spiked-In *C. elegans* miRNAs as Controls.** Given the early stage of plasma/serum miRNA research, no established endogenous small RNA control exists for normalization of technical variations in sample processing or of potential variation in sample quality (i.e., presence of PCR inhibitors due to occult red blood cell lysis in plasma samples, for example). Normalizing by matching the amount of input RNA into the RT reaction is not an appropriate approach because the RNA content of plasma can vary considerably and in fact has been suggested to vary with disease states. We therefore chose to use a fixed volume of RNA eluate (1.67  $\mu$ l) from a given volume of starting plasma, rather than a fixed mass of RNA, as input into the RT reaction. For example, for a sample

in which the starting plasma volume was 400  $\mu$ l, an input of 1.67  $\mu$ l of eluted RNA (taken from a total RNA eluate volume of  $\sim$ 80  $\mu$ l) into the RT reaction corresponds to the mass of RNA derived from  $\sim$ 8.3  $\mu$ l of starting plasma.

We devised an approach for data normalization based upon spiking in three synthetic RNA oligonucleotides corresponding to miRNAs that do not exist in the mouse or human genomes. These RNAs were synthesized to match the sequence of three *C. elegans* miRNAs, *cel-miR-39*, *cel-miR-54*, and *cel-miR-238* (purchased as custom RNA oligonucleotide syntheses from Qiagen) and were confirmed empirically as not cross-hybridizing with probes for known human miRNAs on a locked nucleic acid-probe-based microRNA microarray (data not shown). The spiked-in oligos were introduced (as a mixture of 25 fmol of each oligonucleotide in a 5- $\mu$ l total volume of water) after addition of 2X Denaturing Solution (Ambion) to the plasma or serum sample to avoid degradation by endogenous plasma RNases. For each RNA sample, the *C. elegans* spiked-in miRNAs were measured using TaqMan qRT-PCR assays (Applied Biosystems) as described earlier.

We normalized the data across samples using a median normalization procedure. For each sample, the Ct values obtained for the three spiked-in *C. elegans* miRNAs were averaged to generate SpikeIn\_Average\_Ct value. The median of the SpikeIn\_Average\_Ct values obtained from all of the samples to be compared was next calculated (designated here as the Median\_SpikeIn\_Ct value). A Normalization\_Factor was then calculated for each sample based on the following formula:  $\text{Normalization\_Factor} = 1/[2^{\text{Median\_SpikeIn\_Ct value}} - (\text{SpikeIn\_Average\_Ct value of the given sample})]$ . The number of copies of a given miRNA in each sample (calculated using the standard curves described earlier) was multiplied by the Normalization\_Factor corresponding to the sample to obtain a normalized copy number value. In cases where it was desirable to apply normalization directly to Raw\_Ct values corresponding to miRNAs of interest (e.g., Fig. 2A), the Raw\_Ct for a given miRNA in a given sample was adjusted as follows:  $\text{Normalized\_Ct value for the miRNA in the sample} = \text{Raw\_Ct value} - [(\text{SpikeIn\_Average\_Ct value of the given sample}) - (\text{Median\_SpikeIn\_Ct value})]$ .

**miRNA Profiling Using TaqMan Low-Density Array miRNA qRT-PCR Technology.** MiRNA expression in the 22Rv1 prostate cancer cell line and in a plasma sample of RNA from a healthy human donor (individual 006, Table S6) was profiled using TaqMan Human MicroRNA Arrays (v1.0), using the manufacturer's recommended protocol (Applied Biosystems.). This is a version of the TaqMan Low-Density Array (TLDA) qRT-PCR profiling platform. Briefly, the RNA was reverse transcribed using the TaqMan MiRNA Reverse Transcription Kit, and the TaqMan MiRNA Multiplex RT Assays, Human Pool Set. One-hundred nanograms of 22Rv1 RNA or 2  $\mu$ l of human plasma RNA was added to each of the eight multiplex reverse transcription reactions. Multiplex RT reactions were diluted 62.5-fold with water, and 55  $\mu$ l of each diluted product was combined with 55  $\mu$ l of TaqMan 2X Universal PCR Master Mix, No AmpErase UNG. One-hundred microliters of the sample/master mix for each Multiplex pool was loaded into the array, the array was then centrifuged and mechanically sealed with the Applied Biosystems sealer device. qRT-PCR was carried out on an Applied BioSystems 7900HT thermocycler using the manufacturer's recommended cycling conditions. Data were analyzed with SDS Relative Quantification Software version 2.2.2 (Applied Biosystems), with an assigned minimum threshold of 0.123518, which was above the baseline of all assays showing measurable amplification above background.

**Selection of Prostate Cancer miRNA Biomarker Candidates.** To identify candidate serum miRNA biomarkers for prostate cancer, we began by examining human prostate cancer miRNA expression data from the large cancer miRNA profiling dataset of Lu *et al.* (3). In this dataset, 126 of the 151 miRNAs profiled were detectable across prostate cancer samples (with detectable expression defined as  $\log_2$  expression value  $>5$ ). We next intersected this list of 126 miRNAs with results from a prostate cancer miRNA profiling study published by Porkka *et al.* (4), which yielded 40 miRNAs that were detected in prostate cancer samples in both studies. Reasoning that an ideal miRNA cancer biomarker candidate should have low or absent expression in plasma from healthy individuals, we compiled a list of miRNAs detectable at baseline in normal human plasma by (i) examining the list of miRNAs identified in the plasma miRNA experiment reported in Fig. 1A (with methods as described), and (ii) miRNA profiling of healthy-donor plasma using a TaqMan Human MiRNA Array v1.0 (this is a moderate-sensitivity TaqMan qRT-PCR-based platform for miRNA profiling; data from this profiling experiment are provided in Table S9). We removed from our list of biomarker candidates any miRNAs that were sequenced in the plasma miRNA cloning study or that were detected at any Ct value in the plasma TaqMan miRNA qRT-PCR Array experiment. These procedures yielded a list of six miRNA biomarker candidates: *miR-100*, *miR-125b*, *miR-141*, *miR-143*, *miR-205*, and *miR-296*, which were measured in RNA samples derived from pools of prostate cancer cases and controls as described earlier.

**Characterization of the Stability of miRNAs in Plasma by Prolonged Incubation at Room Temperature and Subjection to Repetitive Freeze-Thaw Cycles.** Human plasma from individuals 006 and 008 (plasma donors described in Table S6) was isolated from whole blood as described. Four hundred-microliter aliquots of plasma freshly isolated from each individual were maintained at room temperature for 30 min, 1 h, 2 h, 4 h, 8 h, and 24 h in 2-ml RNase/DNase-free tubes. Experiments were carried out using duplicate plasma aliquots for each time point from each individual. Immediately after completion of an incubation period, samples were processed for RNA isolation by addition of an equal volume (400  $\mu$ l) 2X Denaturing Solution (Ambion), vortexing for 5 min, placing on ice for 5 min (per the manufacturer's protocol) followed by spike in of normalization control miRNA oligos and further RNA isolation as described. Measurement of levels of endogenous human miRNAs and normalization control miRNAs was carried out by qRT-PCR as described and data normalization was performed as described.

To assess the stability of miRNAs in plasma to multiple freeze-thaw cycles, 10 400- $\mu$ l aliquots of freshly isolated plasma from each of the two individuals described above (and from the same plasma batches) as described above were procured for experimentation. Two aliquots corresponding to each individual were initially removed (representing the 0X freeze-thaw samples) and processed for RNA isolation by addition of an equal volume (400  $\mu$ l) 2X Denaturing Solution (Ambion), vortexing for 5 min, placing on ice for 5 minutes (per the manufacturer's protocol) followed by addition of spiked in normalization control miRNA oligos and further RNA isolation as described. The remaining aliquots were frozen by placing on dry ice for 10 min. Plasma aliquots were then allowed to thaw at room temperature for 20 min after which two duplicate aliquots corresponding to each individual were removed (1X freeze-thaw samples) and processed for RNA isolation and addition of spiked in normalization control miRNA oligos as detailed above. The remaining samples were frozen again by placing on dry ice for 10 min, following which the thawing procedure was repeated and two duplicate aliquots from each individual were removed (2X freeze-thaw samples) for RNA isolation and addition of spiked

in normalization control miRNA oligos as detailed above. The freeze-thaw procedure described above was reiterated until 4X and 8X freeze-thaw samples had been collected and processed in a manner identical to that detailed above. Measurement of levels of endogenous human miRNAs and normalization control miRNAs was carried out by qRT-PCR as described and data normalization was performed as described.

**Demonstration of Sensitivity of Synthetic, Exogenous miRNAs to Plasma RNase Activity (and Resistance of Endogenous miRNAs) Using Synthetic Oligo Spike-In Before or After Plasma Denaturation.** Plasma from individual 003 (plasma donor described in Table S6) was isolated from whole blood as described. Two 400- $\mu$ l aliquots were thawed and used for the experiment described here. Synthetic RNA oligonucleotides corresponding to *C. elegans* miRNAs *cel-miR-39*, *cel-miR-54*, and *cel-miR-238* (purchased as custom RNA oligonucleotide syntheses from Qiagen) were added (as a mixture of 25 fmol of each oligonucleotide in a 5- $\mu$ l total volume of water) to one plasma aliquot, followed  $<2$  min later by addition of 400  $\mu$ l of 2X Denaturing Solution, vortexing, and incubation on ice for 5 min. The other plasma aliquot was processed by first adding 400  $\mu$ l of 2X Denaturing Solution, vortexing and incubating on ice for 5 min, after which the mixture of three synthetic *C. elegans* miRNAs described above was added. Denatured samples were carried through the remainder of the plasma RNA isolation procedure as described, followed by TaqMan qRT-PCR for measurement of the spiked-in miRNAs as well as endogenous miRNAs (results presented in Fig. 2B).

**Characterization of Tumor-Derived miRNAs in Mouse Plasma by Differential Centrifugation.** Frozen plasma from 22Rv1 xenografted or control NOD/SCID mice from the second cohort was thawed at room temperature. Two plasma pools were generated (one corresponding to xenograft mice and one corresponding to control mice) by combining equal volume aliquots of plasma from each mouse within a group, yielding a pool of total volume  $\sim 600$   $\mu$ l. Forty microliters of pooled plasma corresponding to xenograft or control groups was centrifuged serially at  $2,000 \times g$ ,  $20^\circ\text{C}$  for 30 min and  $12,000 \times g$  at  $20^\circ\text{C}$  for 45 min in a 5415 R microcentrifuge (Eppendorf). Obviously visible pellets were not obtained; therefore all but  $\sim 10$   $\mu$ l of supernatant was removed to a new tube at each step to avoid disrupting any translucent pellets that might be difficult to visualize. Resulting "pellets" and the  $12,000 \times g$  supernatant were each brought to a 400- $\mu$ l final volume in PBS, following which they were immediately denatured by the addition of 400  $\mu$ l of 2X Denaturing Solution (Ambion) and vortexed to mix. Synthetic *C. elegans* miRNAs *cel-miR-39*, *cel-miR-54*, and *cel-miR-238* (purchased as custom RNA oligonucleotide syntheses from Qiagen) were then added (as a mixture of 25 fmol of each oligonucleotide in a 5  $\mu$ l of total volume) with vortexing briefly to mix. RNA was isolated as described.

**Characterization of Tumor-Derived miRNAs in Mouse Plasma by Microfiltration.** Forty microliters of plasma pools corresponding to xenograft and control groups (aliquots of the same pools as generated for differential centrifugation experiments above) were brought to 100- $\mu$ l final volume in PBS. Millex-GV 0.22- $\mu$ m, 4.0-mm-diameter filter units (Millipore) were prewashed with 500  $\mu$ l of PBS using a 1.0-ml BD Luer-Lok disposable syringe (Becton Dickinson). Each plasma pool was passed through filter unit using a fresh syringe, followed by filtration of an additional 250- $\mu$ l volume of PBS as a wash that was collected and combined with the plasma filtrate and collectively designated as the Filtrate sample. With a fresh syringe, the Retentate was collected by passing 200  $\mu$ l of 2X Denaturing Solution (Ambion) through filter unit, which was then incubated 10 min at room temperature followed by a second passage of 200  $\mu$ l of 2X Denaturing Solution through the filter unit. The PVDF filter membrane was

the manually dissected from HDPE filter apparatus using a sterile scalpel and added into the Retentate flow-through sample. The Retentate samples were vortexed for 10 min to completely solubilize RNA from the filter unit. Retentate samples were briefly spun and then brought to 800  $\mu$ l of final volume with PBS, to which synthetic *C. elegans* miRNAs *cel-miR-39*, *cel-miR-54*, and *cel-miR-238* (purchased as custom RNA oligonucleotide syntheses from Qiagen) were added (as a mixture of 25 fmol of

each oligonucleotide in a 5- $\mu$ l total volume). Filtrate samples were brought to 400- $\mu$ l final volume in PBS and immediately denatured by addition of 400  $\mu$ l of 2X Denaturing Solution. Samples were vortexed after which synthetic *C. elegans* miRNAs *cel-miR-39*, *cel-miR-54*, and *cel-miR-238* (purchased as custom RNA oligonucleotide syntheses from Qiagen) were added (as a mixture of 25 fmol of each oligonucleotide in a 5- $\mu$ l total volume). RNA was isolated as described.

1. Gmyrek GA, et al. (2001) Normal and malignant prostate epithelial cells differ in their response to hepatocyte growth factor/scatter factor. *Am J Pathol* 159:579–590.
2. Lau NC, et al. (2001) An abundant class of tiny RNAs with probable regulatory roles in *Caenorhabditis elegans*. *Science* 294:858–862.
3. Lu J, et al. (2005) MicroRNA expression profiles classify human cancers. *Nature* 435:834–838.
4. Porkka KP, et al. (2007) MicroRNA expression profiling in prostate cancer. *Cancer Res.* 67:6130–6135.

















| Detector                   | Ct               | Mouse homolog? |
|----------------------------|------------------|----------------|
| hsa-miR-29a-4373065        | 27.74265         | Yes            |
| hsa-miR-532-4380928        | 27.765844        | Yes            |
| hsa-miR-342-4373040        | 27.794342        | Yes            |
| hsa-miR-224-4373187        | 27.842451        | Yes            |
| hsa-miR-137-4373174        | 27.852215        | Yes            |
| hsa-miR-28-4373067         | 27.936628        | Yes            |
| hsa-miR-30a-3p-4373062     | 27.945545        | Yes            |
| hsa-miR-30e-3p-4373057     | 27.96953         | Yes            |
| hsa-miR-29c-4373289        | 27.99324         | Yes            |
| hsa-miR-27b-4373068        | 28.023924        | Yes            |
| hsa-miR-203-4373095        | 28.182741        | Yes            |
| hsa-let-7f-4373164         | 28.203585        | Yes            |
| hsa-miR-99b-4373007        | 28.219166        | Yes            |
| hsa-miR-181b-4373116       | 28.323942        | Yes            |
| hsa-miR-328-4373049        | 28.46557         | Yes            |
| hsa-miR-99a-4373008        | 28.475124        | Yes            |
| hsa-miR-15a-4373123        | 28.519396        | Yes            |
| hsa-miR-361-4373035        | 28.542204        | Yes            |
| hsa-miR-181d-4373180       | 28.671408        | Yes            |
| hsa-miR-9*-4378074         | 28.699503        | Yes            |
| hsa-miR-210-4373089        | 28.701073        | Yes            |
| hsa-miR-18a-4373118        | 28.722933        | Yes            |
| hsa-miR-135a-4373140       | 28.735958        | Yes            |
| hsa-miR-362-4378092        | 28.758781        | Yes            |
| hsa-miR-183-4373114        | 28.825584        | Yes            |
| hsa-miR-365-4373194        | 28.891764        | Yes            |
| hsa-miR-146b-4373178       | 28.923525        | Yes            |
| hsa-let-7d-4373166         | 29.013346        | Yes            |
| hsa-miR-192-4373108        | 29.060951        | Yes            |
| hsa-miR-425-4373202        | 29.104452        | Yes            |
| hsa-miR-152-4373126        | 29.110943        | Yes            |
| hsa-miR-378-4373024        | 29.159906        | Yes            |
| hsa-miR-98-4373009         | 29.177269        | Yes            |
| hsa-miR-101-4373159        | 29.2103          | Yes            |
| hsa-miR-23b-4373073        | 29.24969         | Yes            |
| hsa-miR-187-4373111        | 29.379126        | Yes            |
| hsa-miR-196b-4373103       | 29.408249        | Yes            |
| hsa-miR-497-4373222        | 29.532091        | Yes            |
| hsa-miR-218-4373081        | 29.553488        | Yes            |
| hsa-miR-32-4373056         | 29.556976        | Yes            |
| hsa-miR-501-4373226        | 29.55937         | Yes            |
| hsa-miR-194-4373106        | 29.714993        | Yes            |
| hsa-miR-452*-4378077       | 29.761187        | No             |
| hsa-miR-22-4373079         | 29.847921        | Yes            |
| hsa-miR-200a-4378069       | 30.003298        | Yes            |
| <b>hsa-miR-629-4380969</b> | <b>30.080704</b> | <b>No</b>      |
| hsa-miR-135b-4373139       | 30.168968        | Yes            |
| hsa-miR-23a-4373074        | 30.206684        | Yes            |
| hsa-miR-340-4373041        | 30.288404        | Yes            |
| hsa-miR-155-4373124        | 30.64169         | Yes            |
| hsa-miR-200b-4381028       | 30.759663        | Yes            |
| hsa-miR-597-4380960        | 30.817492        | No             |
| hsa-miR-491-4373216        | 30.829758        | Yes            |
| hsa-miR-330-4373047        | 31.041233        | Yes            |
| hsa-miR-339-4373042        | 31.117188        | Yes            |
| hsa-miR-550-4380954        | 31.147772        | No             |
| hsa-miR-222-4373076        | 31.252699        | Yes            |
| hsa-miR-30e-5p-4373058     | 31.28834         | Yes            |
| hsa-miR-193a-4373107       | 31.339767        | Yes            |
| hsa-miR-10b-4373152        | 31.389738        | Yes            |
| hsa-miR-486-4378096        | 31.448664        | Yes            |
| hsa-miR-126-4378064        | 31.58067         | Yes            |
| hsa-miR-107-4373154        | 31.621546        | Yes            |
| hsa-let-7e-4373165         | 31.669636        | Yes            |
| hsa-miR-17-3p-4373120      | 31.723549        | Yes            |

| Detector               | Ct        | Mouse homolog? |
|------------------------|-----------|----------------|
| hsa-miR-548d-4381008   | 31.81656  | No             |
| hsa-miR-500-4373225    | 31.886179 | Yes            |
| hsa-miR-449a-4373207   | 32.123947 | Yes            |
| hsa-miR-642-4380995    | 32.219257 | No             |
| hsa-miR-616-4380992    | 32.286846 | No             |
| hsa-miR-429-4373203    | 32.462257 | Yes            |
| hsa-miR-213-4373086    | 32.498528 | Yes            |
| hsa-miR-509-4373234    | 32.52028  | Yes            |
| hsa-miR-650-4381006    | 32.52341  | No             |
| hsa-miR-130a-4373145   | 32.810963 | Yes            |
| hsa-miR-618-4380996    | 33.05673  | No             |
| hsa-miR-579-4381023    | 33.15031  | No             |
| hsa-miR-545-4380918    | 33.151085 | No             |
| hsa-miR-422a-4373200   | 33.26565  | No             |
| hsa-miR-490-4373215    | 33.30832  | Yes            |
| hsa-miR-449b-4381011   | 33.393772 | Yes            |
| hsa-miR-105-4373157    | 33.459824 | Yes            |
| hsa-miR-622-4380961    | 33.527863 | No             |
| hsa-miR-95-4373011     | 33.590992 | No             |
| hsa-miR-452-4373281    | 33.60625  | Yes            |
| hsa-miR-542-5p-4378105 | 33.620365 | Yes            |
| hsa-miR-424-4373201    | 33.830677 | Yes            |
| hsa-miR-589-4380953    | 33.951397 | No             |
| hsa-miR-204-4373094    | 33.953087 | Yes            |
| hsa-miR-572-4381017    | 33.989155 | No             |
| hsa-miR-502-4373227    | 34.142883 | No             |
| hsa-miR-551a-4380929   | 34.18227  | No             |
| hsa-miR-139-4373176    | 34.18969  | Yes            |
| RNU6B-4373381          | 34.197094 | N/A - a snoRNA |
| hsa-miR-659-4380924    | 34.333885 | No             |
| hsa-miR-34a-4373278    | 34.335876 | Yes            |
| hsa-miR-199a*-4378068  | 34.35002  | Yes            |
| hsa-miR-576-4381021    | 34.364895 | Yes            |
| hsa-miR-219-4373080    | 34.37666  | Yes            |
| hsa-miR-489-4373214    | 34.544186 | Yes            |
| hsa-miR-601-4380965    | 34.77672  | No             |
| hsa-miR-548c-4380993   | 34.893776 | No             |
| hsa-miR-580-4381024    | 34.9058   | No             |
| hsa-miR-520d-4373254   | 35.041225 | No             |
| hsa-miR-126*-4373269   | 35.08921  | Yes            |
| hsa-miR-96-4373010     | 35.45431  | Yes            |
| hsa-miR-515-3p-4373241 | 35.585583 | No             |
| hsa-miR-181c-4373115   | 35.639126 | Yes            |
| hsa-miR-504-4373229    | 35.7073   | Yes            |
| hsa-miR-422b-4373016   | 35.73341  | Yes            |
| hsa-miR-142-3p-4373136 | 35.883354 | Yes            |
| hsa-miR-127-4373147    | 36.043385 | Yes            |
| hsa-miR-518f-4378083   | 36.156406 | No             |
| hsa-miR-627-4380967    | 36.448597 | No             |
| hsa-miR-189-4378067    | 36.58372  | Yes            |
| hsa-miR-514-4373240    | 36.68456  | No             |
| hsa-miR-432*-4378076   | 36.841095 | No             |
| hsa-miR-630-4380970    | 37.480858 | No             |
| hsa-miR-518b-4373246   | 37.488377 | No             |
| hsa-miR-517b-4373244   | 37.707623 | No             |
| hsa-miR-596-4380959    | 37.80205  | No             |
| hsa-miR-518e-4373265   | 37.973427 | No             |
| hsa-miR-586-4380949    | 38.028755 | No             |
| hsa-miR-302c*-4373277  | 38.14734  | Yes            |
| hsa-miR-190-4373110    | 38.190205 | Yes            |
| hsa-miR-146a-4373132   | 38.309822 | Yes            |
| hsa-miR-552-4380930    | 38.393467 | No             |
| hsa-miR-652-4380927    | 38.717022 | Yes            |
| hsa-miR-517a-4373243   | 38.790215 | No             |
| hsa-miR-646-4381002    | 38.79356  | No             |

| Detector               | Ct           | Mouse homolog? |
|------------------------|--------------|----------------|
| hsa-miR-185-4373181    | 38.79913     | Yes            |
| hsa-miR-553-4380931    | 39.17754     | No             |
| hsa-miR-548b-4380951   | 39.343506    | No             |
| hsa-miR-214-4373085    | 39.497402    | Yes            |
| hsa-miR-34b-4373037    | Undetermined |                |
| hsa-miR-34c-4373036    | Undetermined |                |
| hsa-miR-142-5p-4373135 | Undetermined |                |
| hsa-miR-215-4373084    | Undetermined |                |
| hsa-miR-221-4373077    | Undetermined |                |
| hsa-miR-223-4373075    | Undetermined |                |
| hsa-miR-372-4373029    | Undetermined |                |
| hsa-miR-200a-4373273   | Undetermined |                |
| hsa-miR-1-4373161      | Undetermined |                |
| hsa-miR-296-4373066    | Undetermined |                |
| hsa-miR-302a-4373275   | Undetermined |                |
| hsa-miR-302d-4373063   | Undetermined |                |
| hsa-miR-367-4373034    | Undetermined |                |
| hsa-miR-369-5p-4373195 | Undetermined |                |
| hsa-miR-510-4373235    | Undetermined |                |
| hsa-miR-511-4373236    | Undetermined |                |
| hsa-miR-515-5p-4373242 | Undetermined |                |
| hsa-miR-517c-4373264   | Undetermined |                |
| hsa-miR-518a-4373186   | Undetermined |                |
| hsa-miR-518c-4373247   | Undetermined |                |
| hsa-miR-518d-4373248   | Undetermined |                |
| hsa-miR-520a-4373268   | Undetermined |                |
| hsa-miR-520b-4373252   | Undetermined |                |
| hsa-miR-520c-4373253   | Undetermined |                |
| hsa-miR-520e-4373255   | Undetermined |                |
| hsa-miR-520f-4373256   | Undetermined |                |
| hsa-miR-520 g-4373257  | Undetermined |                |
| hsa-miR-520 h-4373258  | Undetermined |                |
| hsa-miR-133a-4373142   | Undetermined |                |
| hsa-miR-184-4373113    | Undetermined |                |
| hsa-miR-206-4373092    | Undetermined |                |
| hsa-miR-211-4373088    | Undetermined |                |
| hsa-miR-216-4373083    | Undetermined |                |
| hsa-miR-217-4373082    | Undetermined |                |
| hsa-miR-371-4373030    | Undetermined |                |
| hsa-miR-379-4373023    | Undetermined |                |
| hsa-miR-381-4373020    | Undetermined |                |
| hsa-miR-198-4373101    | Undetermined |                |
| hsa-miR-133b-4373172   | Undetermined |                |
| hsa-miR-299-5p-4373188 | Undetermined |                |
| hsa-miR-409-5p-4373197 | Undetermined |                |
| hsa-miR-432-4373280    | Undetermined |                |
| hsa-miR-433-4373205    | Undetermined |                |
| hsa-miR-485-5p-4373212 | Undetermined |                |
| hsa-miR-494-4373219    | Undetermined |                |
| hsa-miR-506-4373231    | Undetermined |                |
| hsa-miR-508-4373233    | Undetermined |                |
| hsa-miR-521-4373259    | Undetermined |                |
| hsa-miR-134-4373141    | Undetermined |                |
| hsa-miR-147-4373131    | Undetermined |                |
| hsa-miR-153-4373125    | Undetermined |                |
| hsa-miR-205-4373093    | Undetermined |                |
| hsa-miR-208-4373091    | Undetermined |                |
| hsa-miR-220-4373078    | Undetermined |                |
| hsa-miR-325-4373051    | Undetermined |                |
| hsa-miR-326-4373050    | Undetermined |                |
| hsa-miR-337-4373044    | Undetermined |                |
| hsa-miR-380-3p-4373022 | Undetermined |                |
| hsa-miR-193b-4373185   | Undetermined |                |
| hsa-miR-496-4373221    | Undetermined |                |
| hsa-miR-122a-4373151   | Undetermined |                |



| Detector               | Ct           | Mouse homolog? |
|------------------------|--------------|----------------|
| hsa-miR-124a-4373150   | Undetermined |                |
| hsa-miR-128b-4373170   | Undetermined |                |
| hsa-miR-129-4373171    | Undetermined |                |
| hsa-miR-143-4373134    | Undetermined |                |
| hsa-miR-145-4373133    | Undetermined |                |
| hsa-miR-182-4378066    | Undetermined |                |
| hsa-miR-18b-4373184    | Undetermined |                |
| hsa-miR-202-4378075    | Undetermined |                |
| hsa-miR-202-4373274    | Undetermined |                |
| hsa-miR-299-3p-4373189 | Undetermined |                |
| hsa-miR-302a-4378070   | Undetermined |                |
| hsa-miR-302b-4378071   | Undetermined |                |
| hsa-miR-302b-4373276   | Undetermined |                |
| hsa-miR-302c-4378072   | Undetermined |                |
| hsa-miR-329-4373191    | Undetermined |                |
| hsa-miR-33-4373048     | Undetermined |                |
| hsa-miR-369-3p-4373032 | Undetermined |                |
| hsa-miR-376a-4373026   | Undetermined |                |
| hsa-miR-376b-4373196   | Undetermined |                |
| hsa-miR-380-5p-4373021 | Undetermined |                |
| hsa-miR-410-4378093    | Undetermined |                |
| hsa-miR-412-4373199    | Undetermined |                |
| hsa-miR-512-5p-4373238 | Undetermined |                |
| hsa-miR-199a-4373272   | Undetermined |                |
| hsa-miR-199b-4373100   | Undetermined |                |
| hsa-miR-323-4373054    | Undetermined |                |
| hsa-miR-338-4373043    | Undetermined |                |
| hsa-miR-368-4373033    | Undetermined |                |
| hsa-miR-373-4378073    | Undetermined |                |
| hsa-miR-373-4373279    | Undetermined |                |
| hsa-miR-382-4373019    | Undetermined |                |
| hsa-miR-448-4373206    | Undetermined |                |
| hsa-miR-450-4373208    | Undetermined |                |
| hsa-miR-451-4373209    | Undetermined |                |
| hsa-miR-453-4373210    | Undetermined |                |
| hsa-miR-485-3p-4378095 | Undetermined |                |
| hsa-miR-488-4373213    | Undetermined |                |
| hsa-miR-492-4373217    | Undetermined |                |
| hsa-miR-493-4373218    | Undetermined |                |
| hsa-miR-503-4373228    | Undetermined |                |
| hsa-miR-505-4373230    | Undetermined |                |
| hsa-miR-507-4373232    | Undetermined |                |
| hsa-miR-513-4373239    | Undetermined |                |
| hsa-miR-516-5p-4378099 | Undetermined |                |
| hsa-miR-517-4378078    | Undetermined |                |
| 4343438-Blank          | Undetermined |                |
| hsa-miR-518c-4378082   | Undetermined |                |
| hsa-miR-519b-4373250   | Undetermined |                |
| hsa-miR-519c-4373251   | Undetermined |                |
| hsa-miR-519d-4373266   | Undetermined |                |
| hsa-miR-519e-4373267   | Undetermined |                |
| hsa-miR-522-4373245    | Undetermined |                |
| hsa-miR-523-4373260    | Undetermined |                |
| hsa-miR-524-4378087    | Undetermined |                |
| hsa-miR-526b-4378080   | Undetermined |                |
| hsa-miR-651-4381007    | Undetermined |                |
| hsa-miR-376a-4378104   | Undetermined |                |
| hsa-miR-544-4380919    | Undetermined |                |
| hsa-miR-656-4380920    | Undetermined |                |
| hsa-miR-549-4380921    | Undetermined |                |
| hsa-miR-657-4380922    | Undetermined |                |
| hsa-miR-658-4380923    | Undetermined |                |
| hsa-miR-554-4380932    | Undetermined |                |
| hsa-miR-555-4380933    | Undetermined |                |
| hsa-miR-562-4380939    | Undetermined |                |

| Detector               | Ct           | Mouse homolog? |
|------------------------|--------------|----------------|
| hsa-miR-563-4380940    | Undetermined |                |
| hsa-miR-564-4380941    | Undetermined |                |
| hsa-miR-566-4380943    | Undetermined |                |
| hsa-miR-551b-4380945   | Undetermined |                |
| hsa-miR-569-4380946    | Undetermined |                |
| hsa-miR-570-4380947    | Undetermined |                |
| hsa-miR-548a-4380948   | Undetermined |                |
| hsa-miR-587-4380950    | Undetermined |                |
| hsa-miR-588-4380952    | Undetermined |                |
| hsa-miR-591-4380955    | Undetermined |                |
| hsa-miR-593-4380957    | Undetermined |                |
| hsa-miR-599-4380962    | Undetermined |                |
| hsa-miR-600-4380963    | Undetermined |                |
| hsa-miR-624-4380964    | Undetermined |                |
| hsa-miR-626-4380966    | Undetermined |                |
| hsa-miR-639-4380987    | Undetermined |                |
| hsa-miR-613-4380989    | Undetermined |                |
| hsa-miR-614-4380990    | Undetermined |                |
| hsa-miR-617-4380994    | Undetermined |                |
| hsa-miR-644-4380999    | Undetermined |                |
| hsa-miR-647-4381003    | Undetermined |                |
| hsa-miR-649-4381005    | Undetermined |                |
| hsa-miR-661-4381009    | Undetermined |                |
| hsa-miR-662-4381010    | Undetermined |                |
| hsa-miR-653-4381012    | Undetermined |                |
| hsa-miR-411-4381013    | Undetermined |                |
| hsa-miR-654-4381014    | Undetermined |                |
| 4343438-Blank          | Undetermined |                |
| hsa-miR-575-4381020    | Undetermined |                |
| hsa-miR-578-4381022    | Undetermined |                |
| hsa-miR-585-4381027    | Undetermined |                |
| hsa-miR-512-3p-4381034 | Undetermined |                |
| hsa-miR-631-4380971    | Undetermined |                |
| hsa-miR-363-4380917    | Undetermined |                |
| hsa-miR-487b-4378102   | Undetermined |                |
| hsa-miR-645-4381000    | Undetermined |                |
| hsa-miR-556-4380934    | Undetermined |                |
| hsa-miR-558-4380936    | Undetermined |                |
| hsa-miR-603-4380972    | Undetermined |                |
| hsa-miR-606-4380974    | Undetermined |                |
| hsa-miR-607-4380975    | Undetermined |                |
| hsa-miR-608-4380976    | Undetermined |                |
| hsa-miR-609-4380978    | Undetermined |                |
| hsa-miR-633-4380979    | Undetermined |                |

Assay results for *miR-660* and *miR-629\** are indicated by bold text. Note that miRNA names and assay numbers provided are from the TaqMan TLDA qRT-PCR card literature, which uses miRNA nomenclature that predates the current miRBase release (v.10.1). Of particular note, *miR-629\** as referenced throughout this article is actually listed as a *miR-629* assay in Applied Biosystems TaqMan literature because this miRNA had its name changed from *miR-629* to *miR-629\** between earlier and more recent versions of miRBase. Cycle threshold (Ct) values obtained from qRT-PCR analysis of each miRNA are shown. Yes, No: human miRNAs with homology in mouse are noted. N/A indicates non-miRNA Taqman assays

**Table 2. Results of screening miRNA biomarker candidates by qRT-PCR in serum pools prepared from 25 normal control individuals and 25 patients with advanced prostate cancer**

| miRNA          | Normal controls serum group |                    | Prostate cancer patients serum group |                    |                     | Relative quantification:<br>prostate cancer<br>serum/normal serum |
|----------------|-----------------------------|--------------------|--------------------------------------|--------------------|---------------------|-------------------------------------------------------------------|
|                | Raw Ct                      | $\Delta$ Ct        | Raw Ct                               | $\Delta$ Ct        | $\Delta\Delta$ Ct   | RQ                                                                |
| miR-100        | 21.8918235                  | 5.899684833        | 21.0723035                           | 4.431417167        | -1.468267667        | 2.77                                                              |
| miR-125b       | 22.940055                   | 6.947916333        | 20.922019                            | 4.281132667        | -2.666783667        | 6.35                                                              |
| <b>miR-141</b> | <b>25.4960765</b>           | <b>9.503937833</b> | <b>20.631195</b>                     | <b>3.990308667</b> | <b>-5.513629167</b> | <b>45.68</b>                                                      |
| miR-143        | 23.0193355                  | 7.027196833        | 23.064886                            | 6.423999667        | -0.603197167        | 1.52                                                              |
| miR-205        | NQ                          | NQ                 | NQ                                   | NQ                 | NQ                  | NQ                                                                |
| miR-296        | 22.9490635                  | 6.38040225         | 22.3942595                           | 5.82559825         | -0.554804           | 1.47                                                              |

miRNA expression is represented as raw cycle threshold (Ct) values from qRT-PCR analysis (using SDS software v.2.2.2). Note that cycle threshold values are inversely related to expression level (e.g. a lower Ct value corresponds to higher expression). Delta Ct ( $\Delta$ Ct) values are defined as the Raw Ct value - Avg Ct of spiked-in synthetic *C. elegans* miRNAs for that sample. Additional details about the use of the spiked-in normalization controls are provided in [SI Text](#). Relative quantification (RQ) reflects the ratio of expression in the cancer pool relative to the control pool and is calculated as  $2^{-(\Delta\Delta Ct)}$  where  $\Delta\Delta Ct$  is defined as the  $\Delta Ct_{\text{Cancer}} - \Delta Ct_{\text{Control}}$ . *miR-141* was the most highly overrepresented miRNA in prostate cancer serum among the miRNAs in this group and is highlighted in boldface type. NQ = not quantifiable; in the case of *miR-205* the level of expression of the miRNA was below the limit of quantitation of the assay in both the control and cancer serum pools.



**Table 4. Results of massively parallel sequencing (i.e., 454 sequencing) of small RNA cDNA libraries from human primary prostate epithelial cell (PEC) or primary stromal cell (PSC) cultures**

| miRNA          | No. of reads<br>in PEC | Fraction of reads<br>in PEC | No. of reads<br>in PSC | Fraction of reads<br>in PSC | Ratio: fraction of reads           |  | Fisher's Exact Test <i>P</i> |
|----------------|------------------------|-----------------------------|------------------------|-----------------------------|------------------------------------|--|------------------------------|
|                |                        |                             |                        |                             | in PEC/fraction<br>of Reads in PSC |  |                              |
| hsa-miR-200b   | 49                     | 8.11E-04                    | 0                      |                             | ∞                                  |  | <1E-6                        |
| hsa-miR-141    | 35                     | 5.80E-04                    | 0                      |                             | ∞                                  |  | <1E-6                        |
| hsa-miR-205    | 252                    | 4.17E-03                    | 0                      |                             | ∞                                  |  | <1E-6                        |
| hsa-miR-203    | 28                     | 4.64E-04                    | 0                      |                             | ∞                                  |  | 0.000009                     |
| hsa-miR-200c   | 252                    | 4.17E-03                    | 2                      | 6.09E-05                    | 68.50                              |  | <1E-6                        |
| hsa-let-7b     | 8094                   | 1.34E-01                    | 1419                   | 4.32E-02                    | 3.10                               |  | <1E-6                        |
| hsa-miR-17-5p  | 68                     | 1.13E-03                    | 13                     | 3.96E-04                    | 2.84                               |  | 0.000168                     |
| hsa-miR-30d    | 8                      | 1.32E-04                    | 2                      | 6.09E-05                    | 2.17                               |  | 0.510203                     |
| hsa-let-7a     | 11327                  | 1.88E-01                    | 3199                   | 9.74E-02                    | 1.92                               |  | <1E-6                        |
| hsa-miR-331    | 14                     | 2.32E-04                    | 4                      | 1.22E-04                    | 1.90                               |  | 0.326997                     |
| hsa-miR-19b    | 154                    | 2.55E-03                    | 48                     | 1.46E-03                    | 1.74                               |  | 0.000508                     |
| hsa-miR-224    | 35                     | 5.80E-04                    | 11                     | 3.35E-04                    | 1.73                               |  | 0.123317                     |
| hsa-miR-106b   | 116                    | 1.92E-03                    | 38                     | 1.16E-03                    | 1.66                               |  | 0.006686                     |
| hsa-miR-20a    | 182                    | 3.01E-03                    | 62                     | 1.89E-03                    | 1.60                               |  | 0.001232                     |
| hsa-miR-19a    | 29                     | 4.80E-04                    | 10                     | 3.05E-04                    | 1.58                               |  | 0.242926                     |
| hsa-let-7 g    | 78                     | 1.29E-03                    | 27                     | 8.22E-04                    | 1.57                               |  | 0.041223                     |
| hsa-miR-18a    | 14                     | 2.32E-04                    | 5                      | 1.52E-04                    | 1.52                               |  | 0.480909                     |
| hsa-miR-26a    | 13                     | 2.15E-04                    | 5                      | 1.52E-04                    | 1.41                               |  | 0.626109                     |
| hsa-miR-29b    | 252                    | 4.17E-03                    | 100                    | 3.05E-03                    | 1.37                               |  | 0.007234                     |
| hsa-miR-149    | 7                      | 1.16E-04                    | 3                      | 9.14E-05                    | 1.27                               |  | 1                            |
| hsa-miR-101    | 7                      | 1.16E-04                    | 3                      | 9.14E-05                    | 1.27                               |  | 1                            |
| hsa-miR-23a    | 106                    | 1.76E-03                    | 50                     | 1.52E-03                    | 1.15                               |  | 0.450505                     |
| hsa-miR-424    | 54                     | 8.94E-04                    | 28                     | 8.53E-04                    | 1.05                               |  | 0.908165                     |
| hsa-miR-25     | 28                     | 4.64E-04                    | 15                     | 4.57E-04                    | 1.01                               |  | 1                            |
| hsa-miR-130a   | 88                     | 1.46E-03                    | 52                     | 1.58E-03                    | 0.92                               |  | 0.65821                      |
| hsa-let-7f     | 3096                   | 5.13E-02                    | 1867                   | 5.69E-02                    | 0.90                               |  | 0.000295                     |
| hsa-miR-29a    | 62                     | 1.03E-03                    | 38                     | 1.16E-03                    | 0.89                               |  | 0.600658                     |
| hsa-let-7e     | 52                     | 8.61E-04                    | 32                     | 9.75E-04                    | 0.88                               |  | 0.569916                     |
| hsa-miR-26b    | 26                     | 4.31E-04                    | 16                     | 4.87E-04                    | 0.88                               |  | 0.747137                     |
| hsa-miR-100    | 29                     | 4.80E-04                    | 18                     | 5.48E-04                    | 0.88                               |  | 0.649647                     |
| hsa-miR-382    | 8                      | 1.32E-04                    | 5                      | 1.52E-04                    | 0.87                               |  | 0.778951                     |
| hsa-miR-495    | 7                      | 1.16E-04                    | 5                      | 1.52E-04                    | 0.76                               |  | 0.763773                     |
| hsa-miR-369-3p | 8                      | 1.32E-04                    | 6                      | 1.83E-04                    | 0.72                               |  | 0.581543                     |
| hsa-miR-365    | 33                     | 5.46E-04                    | 25                     | 7.62E-04                    | 0.72                               |  | 0.217416                     |
| hsa-miR-339    | 9                      | 1.49E-04                    | 7                      | 2.13E-04                    | 0.70                               |  | 0.601483                     |
| hsa-miR-16     | 159                    | 2.63E-03                    | 124                    | 3.78E-03                    | 0.70                               |  | 0.00275                      |
| hsa-miR-27a    | 239                    | 3.96E-03                    | 190                    | 5.79E-03                    | 0.68                               |  | 0.000113                     |
| hsa-miR-222    | 163                    | 2.70E-03                    | 137                    | 4.17E-03                    | 0.65                               |  | 0.00021                      |
| hsa-miR-103    | 143                    | 2.37E-03                    | 121                    | 3.69E-03                    | 0.64                               |  | 0.000375                     |
| hsa-miR-34a    | 72                     | 1.19E-03                    | 62                     | 1.89E-03                    | 0.63                               |  | 0.008563                     |
| hsa-miR-22     | 15                     | 2.48E-04                    | 13                     | 3.96E-04                    | 0.63                               |  | 0.236842                     |
| hsa-miR-98     | 123                    | 2.04E-03                    | 108                    | 3.29E-03                    | 0.62                               |  | 0.000319                     |
| hsa-miR-107    | 9                      | 1.49E-04                    | 8                      | 2.44E-04                    | 0.61                               |  | 0.31794                      |
| hsa-miR-30b    | 46                     | 7.62E-04                    | 43                     | 1.31E-03                    | 0.58                               |  | 0.014059                     |
| hsa-miR-21     | 1432                   | 2.37E-02                    | 1394                   | 4.25E-02                    | 0.56                               |  | <1E-6                        |
| hsa-let-7i     | 49                     | 8.11E-04                    | 49                     | 1.49E-03                    | 0.54                               |  | 0.002895                     |
| hsa-miR-30a-5p | 6                      | 9.94E-05                    | 6                      | 1.83E-04                    | 0.54                               |  | 0.365183                     |
| hsa-miR-136    | 13                     | 2.15E-04                    | 14                     | 4.26E-04                    | 0.50                               |  | 0.104627                     |
| hsa-miR-221    | 584                    | 9.67E-03                    | 629                    | 1.92E-02                    | 0.50                               |  | <1E-6                        |
| hsa-miR-143    | 8                      | 1.32E-04                    | 9                      | 2.74E-04                    | 0.48                               |  | 0.134238                     |
| hsa-miR-191    | 22                     | 3.64E-04                    | 25                     | 7.62E-04                    | 0.48                               |  | 0.013708                     |
| hsa-miR-125a   | 6                      | 9.94E-05                    | 7                      | 2.13E-04                    | 0.47                               |  | 0.243234                     |
| hsa-miR-210    | 33                     | 5.46E-04                    | 39                     | 1.19E-03                    | 0.46                               |  | 0.001179                     |
| hsa-let-7d     | 21                     | 3.48E-04                    | 25                     | 7.62E-04                    | 0.46                               |  | 0.008358                     |
| hsa-miR-130b   | 10                     | 1.66E-04                    | 12                     | 3.66E-04                    | 0.45                               |  | 0.072956                     |
| hsa-miR-15a    | 9                      | 1.49E-04                    | 11                     | 3.35E-04                    | 0.44                               |  | 0.098035                     |
| hsa-miR-154    | 9                      | 1.49E-04                    | 11                     | 3.35E-04                    | 0.44                               |  | 0.098035                     |
| hsa-miR-99b    | 46                     | 7.62E-04                    | 62                     | 1.89E-03                    | 0.40                               |  | 0.000003                     |
| hsa-miR-409-3p | 10                     | 1.66E-04                    | 14                     | 4.26E-04                    | 0.39                               |  | 0.029933                     |
| hsa-miR-148b   | 10                     | 1.66E-04                    | 14                     | 4.26E-04                    | 0.39                               |  | 0.029933                     |
| hsa-miR-15b    | 176                    | 2.91E-03                    | 251                    | 7.65E-03                    | 0.38                               |  | <1E-6                        |



**Table 5. Description of commercially purchased RNA oligonucleotides used in standard curve and spike-in experiments**

| miRNA                       | Manufacturer of synthetic miRNA | Synthetic miRNA (oligo) sequence |
|-----------------------------|---------------------------------|----------------------------------|
| <i>miR-15b</i>              | Qiagen                          | AGCAGCACAUCAUGGUUUACA            |
| <i>miR-16</i>               | Qiagen                          | UAGCAGCACGUAAAUAUUGGCG           |
| <i>miR-19b</i>              | Qiagen                          | UGUGCAAAUCCAUGCAAACUGA           |
| <i>miR-24</i>               | Qiagen                          | UGGCUAGUUCAGCAGGAACAG            |
| <i>miR-141</i>              | Sigma                           | UAACACUGUCUGGUAAGAUGG            |
| <i>miR-629*<sup>E</sup></i> | IDT                             | GUUCUCCCAACGUAAGCCAGC            |
| <i>miR-660</i>              | Sigma                           | UACCCAUUGCAUAUCGGAGUUG           |
| <i>cel-miR-39</i>           | Qiagen                          | UCACCGGGUGUAAAUCAGCUUG           |
| <i>cel-miR-54</i>           | Qiagen                          | UACCCGUAUUCUUAUAAUCCGAG          |
| <i>cel-miR-238</i>          | Qiagen                          | UUUGUACUCCGAUGCCAUUCAGA          |

Note: The *miR-629\** oligonucleotide corresponds to the sequence of *miR-629\** in miRBase Release 10.1, but in some earlier releases of miRBase was formerly known as *miR-629*. Likewise, the Applied Biosystem *TaqMan* assays used to measure the *miR-629\** sequence listed are in fact labeled as assays for *miR-629*. In our study, the sequence assayed for and used for generating standard curves is the one listed.

**Table 6. Self-reported information for human donor blood samples used to generate results in Figs. 1 and 2 and Fig. S1 and Fig. S3**

| Sample ID | Gender | History of cancer |
|-----------|--------|-------------------|
| 003       | Female | No                |
| 006       | Male   | No                |
| 008       | Male   | No                |
| 013       | Male   | No                |
| 019       | Male   | No                |
| 021       | Male   | No                |



**Table 7. Masses of frozen tumors collected from 12 mice from the first 22Rv1 xenograft cohort (i.e., the cohort used to generate data in Fig. 3)**

| Xenograft no. | Tumor mass, mg |
|---------------|----------------|
| 1             | 959.5          |
| 2             | 206            |
| 3             | 917.6          |
| 4             | 778.9          |
| 5             | 801.3          |
| 6             | 1314.9         |
| 7             | 986.7          |
| 8             | 1119.8         |
| 9             | 641.6          |
| 10            | 411            |
| 11            | 2175.1         |
| 12            | 1208.6         |

These tumor mass data were used to generate results presented in [Fig. S4](#).

**Table 8. miRNA Taqman assays used in this study**

| miRNA                      | ABI item no. | miRNA Taqman assay target sequence |
|----------------------------|--------------|------------------------------------|
| <i>miR-15b</i>             | 4373122      | UAGCAGCACAUCAUGGUUUACA             |
| <i>miR-16</i>              | 4373121      | UAGCAGCACGUAAAUAUUGGCG             |
| <i>miR-19b</i>             | 4373098      | UGUGCAAUCCAUGCAAACUGA              |
| <i>miR-24</i>              | 4373072      | UGGCUCAGUUCAGCAGGAACAG             |
| <i>miR-100</i>             | 4373160      | AACCCGUAAGUCCGAACUUGUG             |
| <i>miR-125b</i>            | 4373148      | UCCCGAGACCCUAAUUGUGA               |
| <i>miR-141</i>             | 4373137      | UAACACUGUCUGGUAAGAUGG              |
| <i>miR-143</i>             | 4373134      | UGAGAUGAAGCACUGUAGCUCA             |
| <i>miR-205</i>             | 4373093      | UCCUUCAUUCCACCGAGUCUG              |
| <i>miR-296</i>             | 4373066      | AGGGCCCCCUCAAUCCUGU                |
| <i>miR-629<sup>f</sup></i> | 4380969      | GUUCUCCAACGUAAGCCCAGC              |
| <i>miR-660</i>             | 4380925      | UACCCAUUGCAUAUCGGAGUUG             |
| <i>cel-miR-39</i>          | 4373455      | UCACCGGGUGUAAAUCAGCUUG             |
| <i>cel-miR-54</i>          | 4381162      | UACCCGUAUUCUUAUAAUCCGAG            |
| <i>cel-miR-238</i>         | 4373437      | UUUGUACUCCGAUGCCAUCAGA             |

miRNA assays were designed against human miRNA sequences except for *cel-miR-39*, *cel-miR-54*, and *cel-miR-238*, which were designed against *C. elegans* miRNA sequences. Note that miRNA names and assay numbers provided are from the TaqMan qRT-PCR literature (Applied BioSystems), which uses miRNA nomenclature that predates the current miRBase release (v.10.1). In particular, *miR-629\** as referenced throughout this article is listed as *miR-629* in some earlier miRBase releases and is likewise labeled as the TaqMan assay for *miR-629* in the Applied BioSystems literature.

**Table 9. Results of TaqMan Low-Density array qRT-PCR profiling of human plasma from a healthy donor**

| miRNA                  | Ct value  | miRNA                  | Ct value  |
|------------------------|-----------|------------------------|-----------|
| hsa-miR-223-4373075    | 21.387175 | RNU48-4373383          | 31.515448 |
| hsa-miR-16-4373121     | 23.676111 | hsa-let-7a-4373169     | 31.531221 |
| hsa-miR-126-4378064    | 25.18676  | hsa-miR-181d-4373180   | 31.545853 |
| hsa-miR-26a-4373070    | 25.349148 | hsa-miR-32-4373056     | 31.569336 |
| hsa-miR-24-4373072     | 25.352934 | hsa-miR-376a-4373026   | 31.573658 |
| hsa-miR-19b-4373098    | 25.541594 | hsa-miR-152-4373126    | 31.622772 |
| hsa-miR-142-3p-4373136 | 25.777431 | hsa-miR-532-4380928    | 31.661785 |
| hsa-miR-92-4373013     | 26.029703 | hsa-miR-451-4373209    | 31.692917 |
| hsa-miR-26b-4373069    | 26.197817 | hsa-miR-324-3p-4373053 | 31.720333 |
| hsa-miR-191-4373109    | 26.402868 | hsa-miR-410-4378093    | 31.905563 |
| hsa-miR-20a-4373286    | 26.709143 | hsa-miR-340-4373041    | 31.926765 |
| hsa-miR-146a-4373132   | 26.751621 | hsa-miR-148a-4373130   | 31.928728 |
| hsa-miR-484-4381032    | 26.773163 | hsa-miR-199a-4378068   | 32.002617 |
| hsa-miR-222-4373076    | 27.214977 | hsa-miR-487b-4378102   | 32.159157 |
| hsa-miR-93-4373012     | 27.30701  | RNU48-4373383          | 32.170868 |
| hsa-miR-486-4378096    | 27.477003 | hsa-miR-224-4373187    | 32.18172  |
| hsa-miR-186-4373112    | 27.807243 | hsa-miR-18a-4373118    | 32.210087 |
| hsa-miR-126-4373269    | 27.860714 | hsa-miR-29a-4373065    | 32.36902  |
| hsa-miR-30b-4373290    | 28.025436 | hsa-miR-30e-3p-4373057 | 32.405838 |
| hsa-miR-15b-4373122    | 28.029036 | hsa-miR-200c-4373096   | 32.412086 |
| hsa-miR-30c-4373060    | 28.051128 | hsa-miR-22-4373079     | 32.444557 |
| hsa-miR-19a-4373099    | 28.140797 | hsa-miR-339-4373042    | 32.55535  |
| hsa-miR-221-4373077    | 28.160389 | hsa-miR-155-4373124    | 32.556374 |
| hsa-miR-151-4373179    | 28.363777 | hsa-miR-433-4373205    | 32.639957 |
| hsa-miR-142-5p-4373135 | 28.433594 | hsa-miR-192-4373108    | 32.696526 |
| hsa-miR-103-4373158    | 28.643219 | hsa-miR-27b-4373068    | 32.729248 |
| hsa-miR-17-5p-4373119  | 28.771618 | hsa-miR-99b-4373007    | 32.960518 |
| hsa-miR-30a-5p-4373061 | 28.948341 | hsa-miR-23b-4373073    | 32.97151  |
| hsa-miR-140-4373138    | 29.038239 | hsa-miR-491-4373216    | 33.038338 |
| hsa-miR-342-4373040    | 29.161871 | RNU44-4373384          | 33.05032  |
| hsa-miR-425-5p-4380926 | 29.179981 | hsa-miR-423-4373015    | 33.054043 |
| hsa-miR-27a-4373287    | 29.258652 | hsa-miR-133b-4373172   | 33.080162 |
| hsa-miR-320-4373055    | 29.308796 | hsa-miR-148b-4373129   | 33.082035 |
| hsa-miR-106b-4373155   | 29.49641  | hsa-miR-383-4373018    | 33.127384 |
| hsa-miR-374-4373028    | 29.52162  | hsa-miR-15a-4373123    | 33.143764 |
| hsa-miR-30d-4373059    | 29.610056 | hsa-miR-98-4373009     | 33.154266 |
| hsa-miR-146b-4373178   | 29.699888 | hsa-miR-345-4373039    | 33.263832 |
| hsa-miR-432-4373280    | 29.779055 | hsa-miR-375-4373027    | 33.360348 |
| hsa-miR-197-4373102    | 29.831097 | hsa-miR-660-4380925    | 33.55976  |
| hsa-miR-331-4373046    | 29.86672  | hsa-let-7f-4373164     | 33.60402  |
| hsa-miR-127-4373147    | 29.948317 | hsa-miR-550-4380954    | 33.62478  |
| hsa-let-7 g-4373163    | 29.965107 | RNU44-4373384          | 33.718765 |
| hsa-miR-125a-4373149   | 29.986898 | RNU44-4373384          | 33.909008 |
| hsa-miR-328-4373049    | 30.116018 | hsa-miR-1-4373161      | 33.91329  |
| hsa-miR-301-4373064    | 30.40973  | hsa-miR-210-4373089    | 33.956635 |
| hsa-miR-382-4373019    | 30.51329  | hsa-miR-189-4378067    | 33.97108  |
| hsa-miR-21-4373090     | 30.570774 | RNU44-4373384          | 33.97398  |
| hsa-miR-28-4373067     | 30.670748 | hsa-miR-23a-4373074    | 34.062016 |
| hsa-miR-425-4373202    | 30.68779  | hsa-let-7d-4373166     | 34.074215 |
| hsa-miR-20b-4373263    | 30.689703 | hsa-miR-424-4373201    | 34.11119  |
| hsa-let-7b-4373168     | 30.78085  | RNU44-4373384          | 34.251835 |
| hsa-miR-195-4373105    | 30.927505 | hsa-miR-493-4373218    | 34.25925  |
| hsa-miR-134-4373141    | 30.999826 | hsa-miR-29c-4373289    | 34.266956 |
| hsa-miR-130a-4373145   | 31.000528 | hsa-miR-362-4378092    | 34.38831  |
| hsa-miR-130b-4373144   | 31.078936 | hsa-miR-378-4373024    | 34.471447 |
| RNU48-4373383          | 31.113333 | hsa-miR-361-4373035    | 34.52986  |
| hsa-miR-25-4373071     | 31.12904  | hsa-miR-330-4373047    | 34.549976 |
| hsa-miR-485-3p-4378095 | 31.133604 | hsa-miR-145-4373133    | 34.583946 |
| RNU48-4373383          | 31.251173 | RNU44-4373384          | 34.836792 |
| RNU48-4373383          | 31.336447 | hsa-miR-107-4373154    | 34.892826 |
| hsa-miR-411-4381013    | 31.392809 | hsa-miR-379-4373023    | 35.036655 |
| RNU48-4373383          | 31.430758 | hsa-miR-199a-4373272   | 35.053696 |
| hsa-miR-335-4373045    | 31.442823 | hsa-miR-196b-4373103   | 35.070187 |
| RNU48-4373383          | 31.452744 | hsa-miR-101-4373159    | 35.332664 |
| RNU48-4373383          | 31.479742 | hsa-miR-494-4373219    | 35.349953 |
|                        |           | hsa-miR-485-5p-4373212 | 35.529865 |
|                        |           | hsa-miR-183-4373114    | 35.559986 |

| miRNA                  | Ct value     | miRNA                  | Ct value     |
|------------------------|--------------|------------------------|--------------|
| hsa-miR-326-4373050    | 35.68104     | hsa-miR-194-4373106    | Undetermined |
| hsa-miR-572-4381017    | 35.794235    | hsa-miR-203-4373095    | Undetermined |
| hsa-miR-657-4380922    | 35.9125      | hsa-miR-204-4373094    | Undetermined |
| hsa-miR-30e-5p-4373058 | 35.951595    | hsa-miR-206-4373092    | Undetermined |
| RNU44-4373384          | 36.030655    | hsa-miR-211-4373088    | Undetermined |
| hsa-miR-7-4373014      | 36.180187    | hsa-miR-216-4373083    | Undetermined |
| hsa-let-7c-4373167     | 36.44413     | hsa-miR-217-4373082    | Undetermined |
| hsa-miR-17-3p-4373120  | 36.803318    | hsa-miR-371-4373030    | Undetermined |
| hsa-miR-99a-4373008    | 37.132515    | hsa-miR-381-4373020    | Undetermined |
| hsa-miR-181b-4373116   | 37.506042    | hsa-miR-198-4373101    | Undetermined |
| hsa-miR-190-4373110    | 38.05101     | hsa-miR-299-5p-4373188 | Undetermined |
| hsa-miR-199b-4373100   | 39.025414    | hsa-miR-31-4373190     | Undetermined |
| hsa-miR-181c-4373115   | 39.53926     | hsa-miR-409-5p-4373197 | Undetermined |
| hsa-let-7e-4373165     | Undetermined | hsa-miR-489-4373214    | Undetermined |
| hsa-miR-10a-4373153    | Undetermined | hsa-miR-506-4373231    | Undetermined |
| hsa-miR-10b-4373152    | Undetermined | hsa-miR-508-4373233    | Undetermined |
| hsa-miR-34a-4373278    | Undetermined | hsa-miR-521-4373259    | Undetermined |
| hsa-miR-34b-4373037    | Undetermined | hsa-miR-147-4373131    | Undetermined |
| hsa-miR-34c-4373036    | Undetermined | hsa-miR-149-4373128    | Undetermined |
| hsa-miR-141-4373137    | Undetermined | hsa-miR-153-4373125    | Undetermined |
| hsa-miR-215-4373084    | Undetermined | hsa-miR-187-4373111    | Undetermined |
| hsa-miR-218-4373081    | Undetermined | hsa-miR-193a-4373107   | Undetermined |
| hsa-miR-372-4373029    | Undetermined | hsa-miR-196a-4373104   | Undetermined |
| hsa-miR-9-4373285      | Undetermined | hsa-miR-205-4373093    | Undetermined |
| hsa-miR-137-4373174    | Undetermined | hsa-miR-208-4373091    | Undetermined |
| hsa-miR-200a-4373273   | Undetermined | hsa-miR-213-4373086    | Undetermined |
| hsa-miR-125b-4373148   | Undetermined | hsa-miR-214-4373085    | Undetermined |
| hsa-miR-296-4373066    | Undetermined | hsa-miR-220-4373078    | Undetermined |
| hsa-miR-302a-4373275   | Undetermined | hsa-miR-325-4373051    | Undetermined |
| hsa-miR-302c-4373277   | Undetermined | hsa-miR-337-4373044    | Undetermined |
| hsa-miR-302d-4373063   | Undetermined | hsa-miR-380-3p-4373022 | Undetermined |
| hsa-miR-324-5p-4373052 | Undetermined | hsa-miR-422b-4373016   | Undetermined |
| hsa-miR-367-4373034    | Undetermined | hsa-miR-182-4373271    | Undetermined |
| hsa-miR-369-5p-4373195 | Undetermined | hsa-miR-422a-4373200   | Undetermined |
| hsa-miR-449-4373207    | Undetermined | hsa-miR-193b-4373185   | Undetermined |
| hsa-miR-497-4373222    | Undetermined | hsa-miR-365-4373194    | Undetermined |
| hsa-miR-501-4373226    | Undetermined | hsa-miR-429-4373203    | Undetermined |
| hsa-miR-509-4373234    | Undetermined | hsa-miR-496-4373221    | Undetermined |
| hsa-miR-510-4373235    | Undetermined | hsa-miR-500-4373225    | Undetermined |
| hsa-miR-511-4373236    | Undetermined | hsa-miR-502-4373227    | Undetermined |
| hsa-miR-514-4373240    | Undetermined | RNU6B-4373381          | Undetermined |
| hsa-miR-515-3p-4373241 | Undetermined | hsa-miR-105-4373157    | Undetermined |
| hsa-miR-515-5p-4373242 | Undetermined | hsa-miR-122a-4373151   | Undetermined |
| hsa-miR-517a-4373243   | Undetermined | hsa-miR-124a-4373150   | Undetermined |
| hsa-miR-517b-4373244   | Undetermined | hsa-miR-128b-4373170   | Undetermined |
| hsa-miR-517c-4373264   | Undetermined | hsa-miR-129-4373171    | Undetermined |
| hsa-miR-518a-4373186   | Undetermined | hsa-miR-139-4373176    | Undetermined |
| hsa-miR-518b-4373246   | Undetermined | hsa-miR-143-4373134    | Undetermined |
| hsa-miR-518c-4373247   | Undetermined | hsa-miR-182-4378066    | Undetermined |
| hsa-miR-518d-4373248   | Undetermined | hsa-miR-185-4373181    | Undetermined |
| hsa-miR-518e-4373265   | Undetermined | hsa-miR-18b-4373184    | Undetermined |
| hsa-miR-520a-4373268   | Undetermined | hsa-miR-200a-4378069   | Undetermined |
| hsa-miR-520b-4373252   | Undetermined | hsa-miR-202-4378075    | Undetermined |
| hsa-miR-520c-4373253   | Undetermined | hsa-miR-202-4373274    | Undetermined |
| hsa-miR-520d-4373254   | Undetermined | hsa-miR-299-3p-4373189 | Undetermined |
| hsa-miR-520e-4373255   | Undetermined | hsa-miR-302a-4378070   | Undetermined |
| hsa-miR-520f-4373256   | Undetermined | hsa-miR-302b-4378071   | Undetermined |
| hsa-miR-520 g-4373257  | Undetermined | hsa-miR-302b-4373276   | Undetermined |
| hsa-miR-520 h-4373258  | Undetermined | hsa-miR-302c-4378072   | Undetermined |
| hsa-miR-30a-3p-4373062 | Undetermined | hsa-miR-329-4373191    | Undetermined |
| hsa-miR-95-4373011     | Undetermined | hsa-miR-33-4373048     | Undetermined |
| hsa-miR-100-4373160    | Undetermined | hsa-miR-369-3p-4373032 | Undetermined |
| hsa-miR-132-4373143    | Undetermined | hsa-miR-376b-4373196   | Undetermined |
| hsa-miR-133a-4373142   | Undetermined | hsa-miR-380-5p-4373021 | Undetermined |
| hsa-miR-135a-4373140   | Undetermined | hsa-miR-412-4373199    | Undetermined |
| hsa-miR-135b-4373139   | Undetermined | hsa-miR-432-4378076    | Undetermined |
| hsa-miR-184-4373113    | Undetermined | hsa-miR-512-5p-4373238 | Undetermined |

| miRNA                  | Ct value     | miRNA                  | Ct value     |
|------------------------|--------------|------------------------|--------------|
| hsa-miR-9-4378074      | Undetermined | hsa-miR-597-4380960    | Undetermined |
| hsa-miR-219-4373080    | Undetermined | hsa-miR-622-4380961    | Undetermined |
| hsa-miR-323-4373054    | Undetermined | hsa-miR-599-4380962    | Undetermined |
| hsa-miR-338-4373043    | Undetermined | hsa-miR-600-4380963    | Undetermined |
| RNU44-4373384          | Undetermined | hsa-miR-624-4380964    | Undetermined |
| hsa-miR-368-4373033    | Undetermined | hsa-miR-601-4380965    | Undetermined |
| hsa-miR-373-4378073    | Undetermined | hsa-miR-626-4380966    | Undetermined |
| hsa-miR-373-4373279    | Undetermined | hsa-miR-629-4380969    | Undetermined |
| hsa-miR-448-4373206    | Undetermined | hsa-miR-548d-4381008   | Undetermined |
| hsa-miR-450-4373208    | Undetermined | hsa-miR-639-4380987    | Undetermined |
| hsa-miR-452-4373281    | Undetermined | hsa-miR-613-4380989    | Undetermined |
| hsa-miR-452-4378077    | Undetermined | hsa-miR-614-4380990    | Undetermined |
| hsa-miR-453-4373210    | Undetermined | hsa-miR-615-4380991    | Undetermined |
| hsa-miR-488-4373213    | Undetermined | hsa-miR-616-4380992    | Undetermined |
| hsa-miR-490-4373215    | Undetermined | hsa-miR-548c-4380993   | Undetermined |
| hsa-miR-492-4373217    | Undetermined | hsa-miR-617-4380994    | Undetermined |
| hsa-miR-503-4373228    | Undetermined | hsa-miR-642-4380995    | Undetermined |
| hsa-miR-504-4373229    | Undetermined | hsa-miR-618-4380996    | Undetermined |
| hsa-miR-505-4373230    | Undetermined | hsa-miR-644-4380999    | Undetermined |
| hsa-miR-507-4373232    | Undetermined | hsa-miR-646-4381002    | Undetermined |
| hsa-miR-513-4373239    | Undetermined | hsa-miR-647-4381003    | Undetermined |
| hsa-miR-516-5p-4378099 | Undetermined | hsa-miR-649-4381005    | Undetermined |
| hsa-miR-517-4378078    | Undetermined | hsa-miR-650-4381006    | Undetermined |
| 4343438-Blank          | Undetermined | hsa-miR-661-4381009    | Undetermined |
| hsa-miR-518c-4378082   | Undetermined | hsa-miR-662-4381010    | Undetermined |
| hsa-miR-518f-4378083   | Undetermined | hsa-miR-449b-4381011   | Undetermined |
| hsa-miR-519b-4373250   | Undetermined | hsa-miR-653-4381012    | Undetermined |
| hsa-miR-519c-4373251   | Undetermined | hsa-miR-654-4381014    | Undetermined |
| hsa-miR-519d-4373266   | Undetermined | 4343438-Blank          | Undetermined |
| hsa-miR-519e-4373267   | Undetermined | hsa-miR-575-4381020    | Undetermined |
| hsa-miR-522-4373245    | Undetermined | hsa-miR-576-4381021    | Undetermined |
| hsa-miR-523-4373260    | Undetermined | hsa-miR-578-4381022    | Undetermined |
| hsa-miR-524-4378087    | Undetermined | hsa-miR-579-4381023    | Undetermined |
| hsa-miR-526b-4378080   | Undetermined | hsa-miR-580-4381024    | Undetermined |
| hsa-miR-96-4373010     | Undetermined | hsa-miR-585-4381027    | Undetermined |
| hsa-miR-651-4381007    | Undetermined | hsa-miR-200b-4381028   | Undetermined |
| hsa-miR-376a-4378104   | Undetermined | hsa-miR-512-3p-4381034 | Undetermined |
| hsa-miR-542-5p-4378105 | Undetermined | hsa-miR-631-4380971    | Undetermined |
| hsa-miR-545-4380918    | Undetermined | hsa-miR-363-4380917    | Undetermined |
| hsa-miR-544-4380919    | Undetermined | hsa-miR-645-4381000    | Undetermined |
| hsa-miR-656-4380920    | Undetermined | hsa-miR-659-4380924    | Undetermined |
| hsa-miR-549-4380921    | Undetermined | hsa-miR-556-4380934    | Undetermined |
| hsa-miR-658-4380923    | Undetermined | hsa-miR-558-4380936    | Undetermined |
| hsa-miR-652-4380927    | Undetermined | hsa-miR-627-4380967    | Undetermined |
| hsa-miR-551a-4380929   | Undetermined | hsa-miR-620-4380970    | Undetermined |
| hsa-miR-552-4380930    | Undetermined | hsa-miR-603-4380972    | Undetermined |
| hsa-miR-553-4380931    | Undetermined | hsa-miR-606-4380974    | Undetermined |
| hsa-miR-554-4380932    | Undetermined | hsa-miR-607-4380975    | Undetermined |
| hsa-miR-555-4380933    | Undetermined | hsa-miR-608-4380976    | Undetermined |
| hsa-miR-562-4380939    | Undetermined | hsa-miR-609-4380978    | Undetermined |
| hsa-miR-563-4380940    | Undetermined | hsa-miR-633-4380979    | Undetermined |
| hsa-miR-564-4380941    | Undetermined |                        |              |
| hsa-miR-565-4380942    | Undetermined |                        |              |
| hsa-miR-566-4380943    | Undetermined |                        |              |
| hsa-miR-551b-4380945   | Undetermined |                        |              |
| hsa-miR-569-4380946    | Undetermined |                        |              |
| hsa-miR-570-4380947    | Undetermined |                        |              |
| hsa-miR-548a-4380948   | Undetermined |                        |              |
| hsa-miR-586-4380949    | Undetermined |                        |              |
| hsa-miR-587-4380950    | Undetermined |                        |              |
| hsa-miR-548b-4380951   | Undetermined |                        |              |
| hsa-miR-588-4380952    | Undetermined |                        |              |
| hsa-miR-589-4380953    | Undetermined |                        |              |
| hsa-miR-591-4380955    | Undetermined |                        |              |
| hsa-miR-593-4380957    | Undetermined |                        |              |
| hsa-miR-594-4380958    | Undetermined |                        |              |
| hsa-miR-596-4380959    | Undetermined |                        |              |

Data were generated by using plasma from Individual 006; see [Table S1](#) for additional information about the donor. Note that miRNA names and assay numbers provided are from the TaqMan TLDA qRT-PCR card literature, which uses miRNA nomenclature that predates the current miRBase release (v.10.1). The first column lists the miRNA name and Applied Biosystems TaqMan miRNA assay identifier. Values in the second column represented cycle threshold (Ct) values obtained from qRT-PCR analysis of the indicated miRNAs. miRNAs are listed in order of increasing Ct values.
